# Supplementary material
Source: PubMed Central journal article supplement (PMC10101608)
Supplement: kidney360-4-069-s001.pdf [file kidney360-4-069-s001.pdf]

## Supplementary Material:

|        |                                                                                                                                                                                                                                                                                  |
|--------|----------------------------------------------------------------------------------------------------------------------------------------------------------------------------------------------------------------------------------------------------------------------------------|
| Page 2 | <b>Supplementary Table S1:</b> Risk of bias of included studies on the Newcastle-Ottawa scale                                                                                                                                                                                    |
| Page 3 | <b>Supplementary Table S2:</b> Systematic review of publications comparing clinical presentation, histopathological findings, outcomes in ANCA negative versus positive patients.                                                                                                |
| Page 5 | <b>Supplementary Table S3:</b> When applying sensitivity analyses with restricted follow-up to 1 and 2 years from the time of diagnosis, multivariate models show comparable hazard ratios when adjusting for ANCA status, gender, eGFR at diagnosis, age and induction therapy. |
| Page 6 | <b>Supplementary Table S4:</b> Meta-analysis results reporting the unadjusted relative risk ratio and moderate to large degree of heterogeneity between studies                                                                                                                  |

**Supplementary Table S1:** Risk of bias of included studies on the Newcastle-Ottawa scale

| Study |                                   | Year of Publication | Selection (Up to 4) | Comparability (Up to 2) | Outcome (Up to 3) | Total |
|-------|-----------------------------------|---------------------|---------------------|-------------------------|-------------------|-------|
| 1     | Córdova-Sánchez <i>et al.</i> (8) | 2016                | 3                   | 1                       | 2                 | 6     |
| 2     | Villacorta <i>et al.</i> (20)     | 2016                | 4                   | 2                       | 3                 | 9     |
| 3     | Shah <i>et al.</i> (17)           | 2015                | 4                   | 1                       | 3                 | 8     |
| 4     | Chen <i>et al.</i> (5)            | 2007                | 3                   | 1                       | 3                 | 7     |
| 5     | Eisenberger <i>et al.</i> (18)    | 2005                | 2                   | 2                       | 2                 | 6     |
| 6     | Lee <i>et al.</i> (7)             | 2015                | 4                   | 2                       | 3                 | 9     |
| 7     | Kantauskaite <i>et al.</i> (33)   | 2018                | 4                   | 2                       | 3                 | 9     |
| 8     | Shah <i>et al.</i> (19)           | 2015                | 3                   | 1                       | 2                 | 6     |
| 9     | Iwakiri <i>et al.</i> (34)        | 2013                | 4                   | 1                       | 3                 | 8     |
| 10    | Hung <i>et al.</i> (6)            | 2006                | 4                   | 2                       | 3                 | 9     |
| 11    | Hedger <i>et al.</i> (4)          | 2000                | 4                   | 2                       | 3                 | 9     |
| 12    | Sokolowska <i>et al.</i> (35)     | 2014                | 4                   | 1                       | 3                 | 8     |
| 13    | Sharma <i>et al.</i> (36)         | 2016                | 3                   | 1                       | 2                 | 6     |

**Supplementary Table S2:** Systematic review of publications comparing clinical presentation, histopathological findings, outcomes in ANCA negative versus positive patients.

| Author | Year                              | Location | Study design | ANCA negative (n)            | Sex Male (%) | Age Years, (mean $\pm$ SD) | eGFR ml/min, (mean $\pm$ SD) | RRT n (%)        | Clinical Presentation | Histopathology                                                    |                              | Outcomes                                                                                 |                                                      |                           |                           |
|--------|-----------------------------------|----------|--------------|------------------------------|--------------|----------------------------|------------------------------|------------------|-----------------------|-------------------------------------------------------------------|------------------------------|------------------------------------------------------------------------------------------|------------------------------------------------------|---------------------------|---------------------------|
|        |                                   |          |              |                              |              |                            |                              |                  |                       | Berden Classification                                             | Histology Findings           | ESKD                                                                                     | Relapse                                              | Mortality                 |                           |
| 1      | Córdova-Sánchez <i>et al.</i> (8) | 2016     | Mexico City  | Single Centre, retrospective | 6            | 2 (33)                     | 48.5 $\pm$ 19                | 20.3 $\pm$ 16    | 2 (33.3)              | 100% kidney involvement. 83.3% presented with RPGN                | 1 Focal<br>2 Sclerosed       | -                                                                                        | -                                                    | -                         | 50% mortality at EOS      |
| 2      | Villacorta <i>et al.</i> (20)     | 2016     | Spain        | Multicentre, retrospective   | 29           | 20 (69)                    | 54.8 $\pm$ 17.2              | 24.9 $\pm$ 21.5  | 10 (34.4)             | Similar extra renal manifestation                                 | Crescentic class most common | Higher % of mesangial proliferation & less tubulitis                                     | No significant difference                            | No significant difference | No significant difference |
| 3      | Shah <i>et al.</i> (17)           | 2015     | USA          | Single Centre, retrospective | 17           | 9 (53)                     | -                            | 16.6 $\pm$ 10.25 | 8 (47.1)              | Less paranasal involvement. kidney function worse at presentation | -                            | Higher degree of interstitial fibrosis                                                   | 41% developed ESKD                                   | Shorter time to remission | 1-year survival similar   |
| 4      | Chen <i>et al.</i> (5)            | 2007     | China        | Single Centre, retrospective | 28           | 16 (57)                    | 39.7 $\pm$ 17.0              | -                | 15 (53.6)             | Less extrarenal involvement                                       | -                            | Lower % of normal glomeruli                                                              | Worse renal survival                                 | -                         | 25% mortality at EOS      |
| 5      | Eisenberger <i>et al.</i> (18)    | 2005     | Europe       | Multicentre, retrospective   | 20           | 15 (75)                    | 61.3 $\pm$ 13.1              | -                | 4 (20)                | High prevalence of constitutional symptoms and joint involvement  | -                            | Moderate to severe interstitial infiltrates. 50% crescents, 21% sclerotic.               | -                                                    | -                         | 35% over 5 years          |
| 6      | Lee <i>et al.</i> (7)             | 2015     | Korea        | Single Centre, retrospective | 6            | 6 (100)                    | 67.5 $\pm$ 7.7               | 25.2 $\pm$ 17.8  | -                     | -                                                                 | -                            | 60% had severe interstitial inflammation<br>9.8% global sclerosis and<br>52.6% crescents | The HR of ESKD was 3.190 times in ANCA -VE patients. | -                         | 33% mortality at EOS      |

|    |                                 |      |             |                                            |    |         |             |            |           |                                                                 |                                                                       |                                                          |                           |                           |                             |
|----|---------------------------------|------|-------------|--------------------------------------------|----|---------|-------------|------------|-----------|-----------------------------------------------------------------|-----------------------------------------------------------------------|----------------------------------------------------------|---------------------------|---------------------------|-----------------------------|
| 7  | Kantauskaite <i>et al.</i> (33) | 2018 | Lithuania   | Single centre, retrospective               | 32 | -       | -           | -          | -         | -                                                               | Focal: 48%<br>Crescentic: 37.5%<br>Sclerotic: 25%<br>Mixed: 33.3%     | -                                                        | No significant difference | -                         | No significant difference   |
| 8  | Shah <i>et al.</i> (19)         | 2015 | USA, Europe | Multicentre, retrospective                 | 2  | 1 (50)  | 64.5 ± 4.95 | 13.5 ± 9.2 | 1 (50)    | -                                                               | Sclerotic: 50%<br>Mixed: 50%                                          | -                                                        | -                         | 1 relapse at 24 months    | One patient died at EOS     |
| 9  | Iwakiri <i>et al.</i> (34)      | 2013 | Japan       | Multicentre, retrospective                 | 11 | -       | -           | -          | 6 (54.5)  | -                                                               | Focal: 27.3%<br>Crescentic: 36.4%<br>Sclerotic: 9%<br>Mixed: 27.3 %   | -                                                        | -                         | -                         | -                           |
| 10 | Hung <i>et al.</i> (6)          | 2006 | Taiwan      | Single centre, retrospective               | 15 | 8 (53)  | 45.1 ±13.5  | -          | 4 (26.7)  | 26.7% pulmonary renal syndrome.<br>73.3 % renal limited disease | -                                                                     | Less crescents, more chronic glomerular lesions          | Worse renal survival      | -                         | -                           |
| 11 | Hedger <i>et al.</i> (4)        | 2000 | UK          | Population based, retrospective            | 35 | 17 (49) | 61 ±15      | -          | 19 (54.3) | Shorter prodrome and less systemic involvement                  | -                                                                     | Crescents seen in 48% of glomeruli                       | -                         | -                         | -                           |
| 12 | Sokolowska <i>et al.</i> (35)   | 2014 | Poland      | Single centre, retrospective & prospective | 35 | 10 (29) | 40 ±13.4    | -          | -         | Less kidney and skin involvement                                | -                                                                     | -                                                        | -                         | No significant difference | One patient died at EOS     |
| 13 | Sharma <i>et al.</i> (36)       | 2016 | India       | Single centre, retrospective               | 33 | 18 (55) | 35.4 ±13.5  | 16.1 ±3.78 | 19 (57.6) | Renal limited with lower rates of extra renal symptoms          | Focal: 9.1%<br>Crescentic: 66.7%<br>Sclerotic: 12.1%<br>Mixed: 12.1 % | Higher % of cellular crescents and interstitial fibrosis | 68.4% ESKD                | -                         | 22.2% mortality             |
| 14 | Floyd <i>et al.</i>             | 2021 | UK          | Single centre, retrospective               | 32 | 21 (66) | 51.4 ±19.7  | 15.7 ±14.7 | 19 (59.3) | Renal limited with lower rates of extra renal symptoms          | Focal: 37.5%<br>Crescentic: 15.6%<br>Sclerotic: 12.5%<br>Mixed: 34.4% | Lower % of normal glomeruli                              | More progressed to ESKD   | Lower relapse rates       | Increased risk of mortality |

ANCA; anti-neutrophil cytoplasmic autoantibodies, ESKD; End Stage Kidney Disease, EOS; End of Study, eGFR estimated glomerular filtration rate (mL/min/1.73 m<sup>2</sup>), HR; hazard ratio, RPGN; rapidly progressive glomerulonephritis, RRT; Renal replacement therapy, SD; Standard deviation, UK; United Kingdom, USA; United States of America

**Supplementary Table S3:** When applying sensitivity analyses with restricted follow-up to 1 and 2 years from the time of diagnosis, multivariate models show comparable hazard ratios when adjusting for ANCA status, gender, eGFR at diagnosis, age and induction therapy.

| ESKD at 1 year follow up |                    |         | ESKD at 2 years of follow up |                    |         |
|--------------------------|--------------------|---------|------------------------------|--------------------|---------|
| Variable                 | HR (95% CI)        | P value | Variable                     | HR (95% CI)        | P value |
| ANCA status              | 5.18 (2.00, 13.43) | <0.001  | ANCA status                  | 6.30 (2.36, 16.83) | <0.001  |
| Gender                   | 0.91 (0.40, 2.09)  | 0.83    | Gender                       | 0.96 (0.42, 2.19)  | 0.93    |
| eGFR at diagnosis        | 0.98 (0.95, 1.00)  | 0.09    | eGFR at diagnosis            | 0.99 (0.96, 1.01)  | 0.27    |
| Age                      | 0.98 (0.96, 1.00)  | 0.11    | Age                          | 0.98 (0.96, 1.01)  | 0.18    |
| Induction Therapy        | 0.84 (0.26, 2.74)  | 0.77    | Induction Therapy            | 1.00 (0.31, 3.26)  | 1.00    |

ANCA; anti-neutrophil cytoplasmic autoantibodies, CI; Confidence Intervals (95%), eGFR; estimated glomerular filtration rate (ml/min.1.73m<sup>2</sup>), ESKD; End Stage Kidney Disease, HR; Hazard ratio

**Supplementary Table S4:** Meta-analysis results reporting the unadjusted relative risk ratio and moderate to large degree of heterogeneity between studies. Not applicable (NA) results are due to insufficient data to create an estimate for the I<sup>2</sup> or tau<sup>2</sup> values.

| Features               | N | Proportion |          | RR [95% CI]        | p-value | I <sup>2</sup> [95% CI] | τ <sup>2</sup>        |
|------------------------|---|------------|----------|--------------------|---------|-------------------------|-----------------------|
|                        |   | ANCA -ve   | ANCA +ve |                    |         |                         |                       |
| Proportion of Males    | 9 | 53.30%     | 50.90%   | 1.19 [0.94 - 1.5]  | 0.156   | 0.53 [0.01 - 0.78]      | 6.24x10 <sup>-2</sup> |
| Mortality              | 8 | 20.80%     | 21.50%   | 1.22 [0.63 - 2.38] | 0.554   | 0.57 [0.05 - 0.8]       | 4.99x10 <sup>-1</sup> |
| ESKD                   | 7 | 43.10%     | 20.40%   | 2.28 [1.42 - 3.65] | 0.001   | 0.62 [0.14 - 0.83]      | 2.37x10 <sup>-1</sup> |
| Relapse                | 2 | 16.30%     | 33.30%   | 0.49 [0.25 - 0.97] | 0.039   | 0 [NA]                  | 0                     |
| RRT at Presentation    | 7 | 46.30%     | 37.10%   | 1.23 [0.78 - 1.93] | 0.374   | 0.72 [0.39 - 0.87]      | 2.21x10 <sup>-1</sup> |
| Berden – Crescentic    | 5 | 35.40%     | 28.30%   | 1.22 [0.79 - 1.88] | 0.376   | 0 [0 - 0.79]            | 6.07x10 <sup>-2</sup> |
| Berden – Focal         | 5 | 26.30%     | 38.30%   | 0.85 [0.58 - 1.23] | 0.380   | 0 [0 - 0.79]            | 0                     |
| Berden - Mixed         | 5 | 27.30%     | 24.80%   | 1.03 [0.69 - 1.53] | 0.901   | 0.03 [0 - 0.8]          | 2.18x10 <sup>-2</sup> |
| Berden - Sclerosed     | 5 | 11.10%     | 8.60%    | 1.22 [0.63 - 2.35] | 0.553   | 0 [0 - 0.79]            | 0                     |
| Renal Limited Disease  | 1 | 22%        | 5.90%    | 2.62 [1.3 - 5.27]  | 0.007   | NA                      | NA                    |
| Features - Extra Renal | 4 | 87.90%     | 96.30%   | 1 [0.96 - 1.04]    | 0.922   | 0.39 [0 - 0.79]         | 3.93x10 <sup>-6</sup> |
| Features Neurological  | 6 | 17.10%     | 14.30%   | 0.83 [0.31 - 2.19] | 0.705   | 0.59 [0 - 0.83]         | 8.12x10 <sup>-1</sup> |
| Features - Cutaneous   | 7 | 32.30%     | 18.70%   | 1.33 [0.86 - 2.06] | 0.201   | 0.71 [0.37 - 0.87]      | 1.98x10 <sup>-1</sup> |
| Features - ENT         | 7 | 22.20%     | 30.80%   | 0.37 [0.16 - 0.85] | 0.020   | 0.65 [0.21 - 0.84]      | 6.38x10 <sup>-1</sup> |
| Features – Ophthalmic  | 6 | 1.40%      | 12.10%   | 0.23 [0.08 - 0.62] | 0.004   | 0 [0 - 0.75]            | 0                     |
| Features - Respiratory | 9 | 39.60%     | 42.30%   | 0.72 [0.55 - 0.94] | 0.017   | 0.52 [0 - 0.77]         | 6.17x10 <sup>-2</sup> |
| Features - Systemic    | 5 | 36.20%     | 42.50%   | 0.7 [0.45 - 1.09]  | 0.115   | 0.56 [0 - 0.84]         | 1.05x10 <sup>-1</sup> |

ANCA; anti-neutrophil cytoplasmic autoantibodies, ESKD; End Stage Kidney Disease, CI; Confidence Intervals (95%), ENT; Ears, nose and throat, I<sup>2</sup> (measure of heterogeneity), N; number, RR; relative risk, RRT; Renal replacement therapy, τ<sup>2</sup> (Measure of variance of true effect size)
